# Supplementary material for: Umbilical Cord-Mesenchymal Stem Cell-Conditioned Medium Improves Insulin Resistance in C2C12 Cell
Source: PubMed Central journal article supplement — Diabetes Metab J. 2020 Jul 10;45(2):260–9. doi: 10.4093/dmj.2019.0191 (PMC8024157; doi:10.4093/dmj.2019.0191), 2020-07-10
Supplement: dmj-2019-0191-s001.pdf [file dmj-2019-0191-s001.pdf]

**Supplementary Table 1.** Primer sequences used in this study

| Gene name    | Forward primer (5'-3') | Reverse primer (3'-5') |
|--------------|------------------------|------------------------|
| <i>Rsp18</i> | TGTGTTAGGGGACTGGTGGACA | CATCACCCACTTACCCCAAAA  |
| <i>COX2</i>  | ATAACCGAGTCGTTCTGCCAAT | TTTCAGAGCATTGGCCATAGAA |
